# Supplementary material for: Emergence and control of photonic band structure in stacked OLED microcavities
Source: PubMed Central journal article supplement (PMC8528838; doi:10.1038/s41467-021-26440-3), 2021-10-20
Supplement: 41467_2021_26440_MOESM3_ESM.pdf [file 41467_2021_26440_MOESM3_ESM.pdf]

## **Description of Additional Supplementary Files**

File name: Supplementary Data 1

Description: Code and all required data and documentation to conduct simulation of the stacked microcavity OLED devices.
